# Supplementary material
Source: PubMed Central journal article supplement (PMC2871499)
Supplement: supp_M109.092015_jbc.M109.092015-1.pdf [file supp_M109.092015_jbc.M109.092015-1.pdf]

## **A combined computational and functional approach identifies new residues involved in pH-dependent gating of ASIC1a**

Luz Angélica Liechti, Simon Bernèche, Benoîte Bargeton, Justyna Iwaszkiewicz, Sophie Roy, Olivier Michielin and Stephan Kellenberger

### **Supplemental Table and Figure file content**

|                  |                                                                                                          |    |
|------------------|----------------------------------------------------------------------------------------------------------|----|
| Suppl. Table S1  | Analysis of the quality of homology models                                                               | 2  |
| Suppl. Table S2  | pKa values and accessible surface area of Asp, Glu and His residues                                      | 3  |
| Suppl. Table S3  | Distance and relative orientation of pairs of Asp and Glu residues                                       | 6  |
| Suppl. Figure S1 | Alignment of ASICs and other family members                                                              | 7  |
| Suppl. Figure S2 | Absence of window current in the E413Q/E418Q double mutant                                               | 9  |
| Suppl. Table S4  | pKa values calculated from the 3HGC-based model in the absence or presence of bound Cs <sup>+</sup> ions | 10 |
| Suppl. Table S5  | Comparison of pH50-shifts relative to wt in this compared to previous studies                            | 11 |
| Suppl. Table S6  | Numbering and species of ASIC residues cited in the discussion                                           | 12 |

### Supplemental Table S1: Analysis of the quality of homology models

| Model                        | C $\alpha$ RMSD with the template (Å) (sequence identity %) | Number of residues in favorable regions of the Ramachandran plot | Number of residues in the generously and additionally allowed regions of the Ramachandran plot | Number of residues in the disallowed regions of the Ramachandran plot |
|------------------------------|-------------------------------------------------------------|------------------------------------------------------------------|------------------------------------------------------------------------------------------------|-----------------------------------------------------------------------|
| Model based on 2QTS template | 0.5 (90%)                                                   | 1048 (92.4%)                                                     | 84 (7.5%)                                                                                      | 2 (0.2%)                                                              |
| Model based on 3HGC template | 0.4 (90%)                                                   | 992 (91.1%)                                                      | 95 (8.7%)                                                                                      | 2 (0.2%)                                                              |

The table indicates the parameters determined by PROCHECK (1) of the two homology models.

1. Laskowski, R. A., MacArthur, M. W., Moss, D. S., and Thornton, J. M. (1993) *J. Appl. Cryst.* **26**, 283-291

**Supplemental Table S2. pKa values and accessible surface area of Asp, Glu and His residues**

| residue | position | pKa values          |       |                  | accessible surface area % |
|---------|----------|---------------------|-------|------------------|---------------------------|
|         |          | unprotonated models |       | stepwise         |                           |
|         |          | 2QTS                | 3HGC  | protonation 2QTS |                           |
| E63     | 1        | 18.35               | 19.97 | -3.81            | 21                        |
|         | 2        | 19.77               | 18.22 | p                |                           |
| H70     |          | 1.86                | 4.50  | -2.48            | 33                        |
| H72     |          | 4.08                | 0.17  | 3.85             | 20                        |
| H73     |          | 5.14                | 5.26  | 4.65             | 13                        |
| D78     | 1        | 2.11                | 9.98  | -5.79            | 11                        |
|         | 2        | 8.42                | 2.61  | p                |                           |
| E79     | 1        | 10.69               | 12.36 | p                | 1                         |
|         | 2        | 6.30                | 11.62 | 2.10             |                           |
| E97     | 1        | 11.03               | 11.43 | 3.88             | 2                         |
|         | 2        | 10.94               | 11.54 | p                |                           |
| D107    | 1        | 3.65                | 5.09  | 2.81             | 0                         |
|         | 2        | 0.57                | 3.08  | -0.45            |                           |
| H110    |          | 4.62                | 4.56  | 4.63             | 10                        |
| E113    | 1        | 6.43                | 4.89  | 6.34             | 14                        |
|         | 2        | 6.17                | 2.72  | 6.07             |                           |
| E123    | 1        | 3.76                | 4.51  | 3.76             | 31                        |
|         | 2        | 3.78                | 1.79  | 3.80             |                           |
| D126    | 1        | 3.78                | 3.29  | 3.80             | 43                        |
|         | 2        | 3.79                | 4.23  | 3.80             |                           |
| D131    | 1        | 4.01                | 3.47  | 4.00             | 34                        |
|         | 2        | 4.05                | 3.42  | 4.05             |                           |
| E132    | 1        | 3.81                | 4.33  | 3.80             | 39                        |
|         | 2        | 3.79                | 4.35  | 3.80             |                           |
| E136    | 1        | 5.39                | 4.69  | 5.53             | 33                        |
|         | 2        | 5.07                | 4.71  | 5.04             |                           |
| D140    | 1        | 4.38                | 4.30  | 4.94             | 32                        |
|         | 2        | 5.17                | 4.25  | 4.51             |                           |
| E156    | 1        | 4.44                | 6.18  | 4.18             | 23                        |
|         | 2        | 5.01                | 4.46  | 4.91             |                           |
| D159    | 1        | 1.63                | 1.13  | 1.22             | 20                        |
|         | 2        | 3.70                | 2.70  | 3.50             |                           |
| H163    |          | 2.95                | -2.57 | -0.15            | 0                         |
| D164    | 1        | -0.82               | -1.04 | -1.49            | 10                        |
|         | 2        | 5.59                | 4.94  | 5.48             |                           |
| D167    | 1        | 3.74                | 3.85  | 2.85             | 23                        |
|         | 2        | 3.71                | 3.70  | 2.87             |                           |
| H173    |          | 4.93                | 5.63  | 4.52             | 20                        |
| E177    | 1        | 8.93                | 3.81  | 2.46             | 24                        |
|         | 2        | 10.59               | 3.56  | p                |                           |
| E182    | 1        | 4.34                | 3.61  | 4.13             | 44                        |
|         | 2        | 4.42                | 4.02  | 4.13             |                           |
| D183    | 1        | 5.12                | 4.78  | 5.11             | 14                        |
|         | 2        | 3.00                | 4.78  | 4.75             |                           |

Supplemental Table S2, page 2

| residue | position | pKa values          |       |                  | accessible surface area % |
|---------|----------|---------------------|-------|------------------|---------------------------|
|         |          | unprotonated models |       | stepwise         |                           |
|         |          | 2QTS                | 3HGC  | protonation 2QTS |                           |
| D202    | 1        | 4.58                | 3.93  | 4.56             | 31                        |
|         | 2        | 4.25                | 3.93  | 4.78             |                           |
| D212    | 1        | 6.18                | 4.72  | 3.93             | 0                         |
|         | 2        | 5.87                | 6.34  | 3.78             |                           |
| E219    | 1        | 7.46                | 7.25  | 4.87             | 18                        |
|         | 2        | 9.43                | 8.32  | 4.90             |                           |
| D223    | 1        | 6.91                | 5.65  | 5.46             | 0                         |
|         | 2        | 5.73                | 5.76  | 5.45             |                           |
| D227    | 1        | 1.54                | 3.34  | -0.85            | 33                        |
|         | 2        | 5.23                | 0.47  | 3.72             |                           |
| E228    | 1        | 7.50                | 6.47  | 7.39             | 6                         |
|         | 2        | 5.25                | 4.17  | 5.13             |                           |
| E235    | 1        | 5.30                | 3.54  | 5.20             | 29                        |
|         | 2        | 1.84                | -1.01 | 1.86             |                           |
| D237    | 1        | 8.50                | 6.07  | 2.26             | 21                        |
|         | 2        | 10.06               | 7.49  | -1.20            |                           |
| E238    | 1        | 12.95               | 6.23  | 1.14             | 2                         |
|         | 2        | 16.76               | 13.21 | p                |                           |
| E242    | 1        | 6.53                | 6.46  | 2.64             | 4                         |
|         | 2        | 8.35                | 6.81  | p                |                           |
| H250    |          | 4.49                | 2.30  | 3.34             | 2                         |
| D253    | 1        | 5.98                | 4.09  | 5.08             | 28                        |
|         | 2        | 5.11                | 4.08  | 5.03             |                           |
| E254    | 1        | 5.95                | 2.86  | 5.83             | 4                         |
|         | 2        | 5.95                | 5.07  | 5.89             |                           |
| D259    | 1        | 4.23                | 4.13  | 4.08             | 13                        |
|         | 2        | 4.27                | 3.27  | 4.13             |                           |
| E277    | 1        | 6.97                | 9.61  | 3.05             | 1                         |
|         | 2        | 8.51                | 9.12  | p                |                           |
| D296    | 1        | 3.94                | 8.53  | 3.93             | 41                        |
|         | 2        | 3.94                | 6.28  | 3.94             |                           |
| D298    | 1        | 4.54                | 8.33  | 3.49             | 42                        |
|         | 2        | 5.02                | 6.77  | 4.99             |                           |
| D300    | 1        | 4.12                | 6.84  | 4.10             | 36                        |
|         | 2        | 4.18                | 10.18 | 4.20             |                           |
| D303    | 1        | 4.14                | 6.90  | 3.94             | 32                        |
|         | 2        | 5.62                | 5.51  | 5.63             |                           |
| D313    | 1        | 5.73                | 12.32 | 2.77             | 6                         |
|         | 2        | 5.04                | 16.96 | 4.60             |                           |
| E315    | 1        | 12.13               | 9.09  | p                | 1                         |
|         | 2        | 14.38               | 9.34  | 6.41             |                           |
| E321    | 1        | 5.09                | 4.25  | 4.99             | 43                        |
|         | 2        | 5.15                | 4.25  | 5.05             |                           |
| H329    |          | 0.33                | 0.84  | -1.52            | 9                         |

Supplemental Table S2, page 3

| residue | position | pKa values          |       |             | accessible surface area % |
|---------|----------|---------------------|-------|-------------|---------------------------|
|         |          | unprotonated models |       | stepwise    |                           |
|         |          | 2QTS                | 3HGC  | protonation |                           |
|         |          |                     |       |             |                           |
| D333    | 1        | 3.78                | 4.21  | 3.79        | 55                        |
|         | 2        | 3.79                | 4.26  | 3.79        |                           |
| E340    | 1        | 4.87                | 3.55  | 4.60        | 25                        |
|         | 2        | 5.02                | 3.55  | 4.63        |                           |
| E344    | 1        | 6.09                | 4.19  | 5.93        | 41                        |
|         | 2        | 4.78                | 4.19  | 5.49        |                           |
| D347    | 1        | 12.00               | 8.90  | 6.35        | 2                         |
|         | 2        | 15.48               | 8.04  | 6.03        |                           |
| D351    | 1        | 7.61                | 3.67  | 3.92        | 9                         |
|         | 2        | 10.64               | 7.27  | p           |                           |
| E355    | 1        | 6.46                | 5.20  | 5.88        | 14                        |
|         | 2        | 5.78                | 6.68  | 5.44        |                           |
| D357    | 1        | 1.55                | 7.60  | -0.11       | 0                         |
|         | 2        | 2.41                | 2.38  | -1.14       |                           |
| E359    | 1        | 4.30                | 4.36  | 4.28        | 42                        |
|         | 2        | 4.30                | 4.36  | 4.28        |                           |
| E364    | 1        | 4.73                | 5.67  | 4.66        | 26                        |
|         | 2        | 4.73                | 5.47  | 4.69        |                           |
| E375    | 1        | 5.87                | 7.53  | 4.53        | 7                         |
|         | 2        | 5.47                | 5.53  | 4.20        |                           |
| E398    | 1        | 4.65                | 4.48  | 4.58        | 24                        |
|         | 2        | 3.36                | 1.33  | 3.31        |                           |
| E403    | 1        | 3.96                | -0.48 | 3.57        | 11                        |
|         | 2        | 1.79                | 4.37  | 1.52        |                           |
| D409    | 1        | 10.45               | 10.08 | 1.15        | 0                         |
|         | 2        | 11.58               | 10.44 | p           |                           |
| E413    | 1        | 7.15                | 1.54  | 6.23        | 5                         |
|         | 2        | 7.05                | 5.10  | 6.40        |                           |
| E418    | 1        | 8.76                | 10.80 | 6.97        | 5                         |
|         | 2        | 8.76                | 10.30 | 7.21        |                           |
| E421    | 1        | 4.38                | 3.42  | 4.17        | 15                        |
|         | 2        | 3.49                | 4.30  | 3.25        |                           |
| E427    | 1        | 4.16                | 7.38  | 3.90        | 26                        |
|         | 2        | 4.16                | 3.59  | 3.88        |                           |
| D434    | 1        | 24.64               | 43.92 | p           | 18                        |
|         | 2        | 15.44               | 36.43 | -7.02       |                           |

pKa values were calculated as described in the text, for the two oxygen atoms of each Asp and Glu; His residues have 1 pKa value. Stepwise protonation, as described in the text; residues marked "p" were protonated in the model, and the pKa of the remaining residues was re-calculated. Iterations of protonation and re-calculation of pKa values of remaining, non-protonated side chains were done until all remaining side chains had a pKa < 5. For residues with pKa between 5 and 8, the pKa calculated in the round just before their own protonation is indicated.

Accessible surface area was calculated from the 2QTS-based model by using the the COOR SEARCH function implemented in the CHARMM c34 molecular mechanics software. The relative accessible surface of acidic residues is shown as percentage of the surface of the isolated residue.

### Supplemental Table S3

Distance and relative orientation of simple pairs of Asp and Glu residues

| <b>residue1</b> | <b>residue2</b> | <b>distance<br/>O-O* (Å)</b> | <b>relative orientation</b>                 |
|-----------------|-----------------|------------------------------|---------------------------------------------|
| E79             | E418            | 5.56                         | towards each other                          |
| E97             | E238            | 5.15                         | same orientation, 97 behind 238             |
| E136            | D140            | 4.03                         | ~parallel                                   |
| D164            | D167            | 4.58                         | ~parallel                                   |
| E219            | D409            | 2.95                         | on two anti-parallel beta-sheets, ~parallel |
| D227            | E228            | 5.05                         | at ~70° Angle                               |
| E355            | D351            | 3.73                         | parallel                                    |
| D357            | E359            | 6.85                         | similar orientation, 357 behind 359         |
| E375            | E413            | 4.96                         | towards each other, angle 120°              |

\*, distances were calculated in Chimera between the closest side-chain oxygen residues of the two acidic side chains from the human ASIC1a model based on the chicken ASIC1 structure 2QTS.

# Supplemental Figure S1

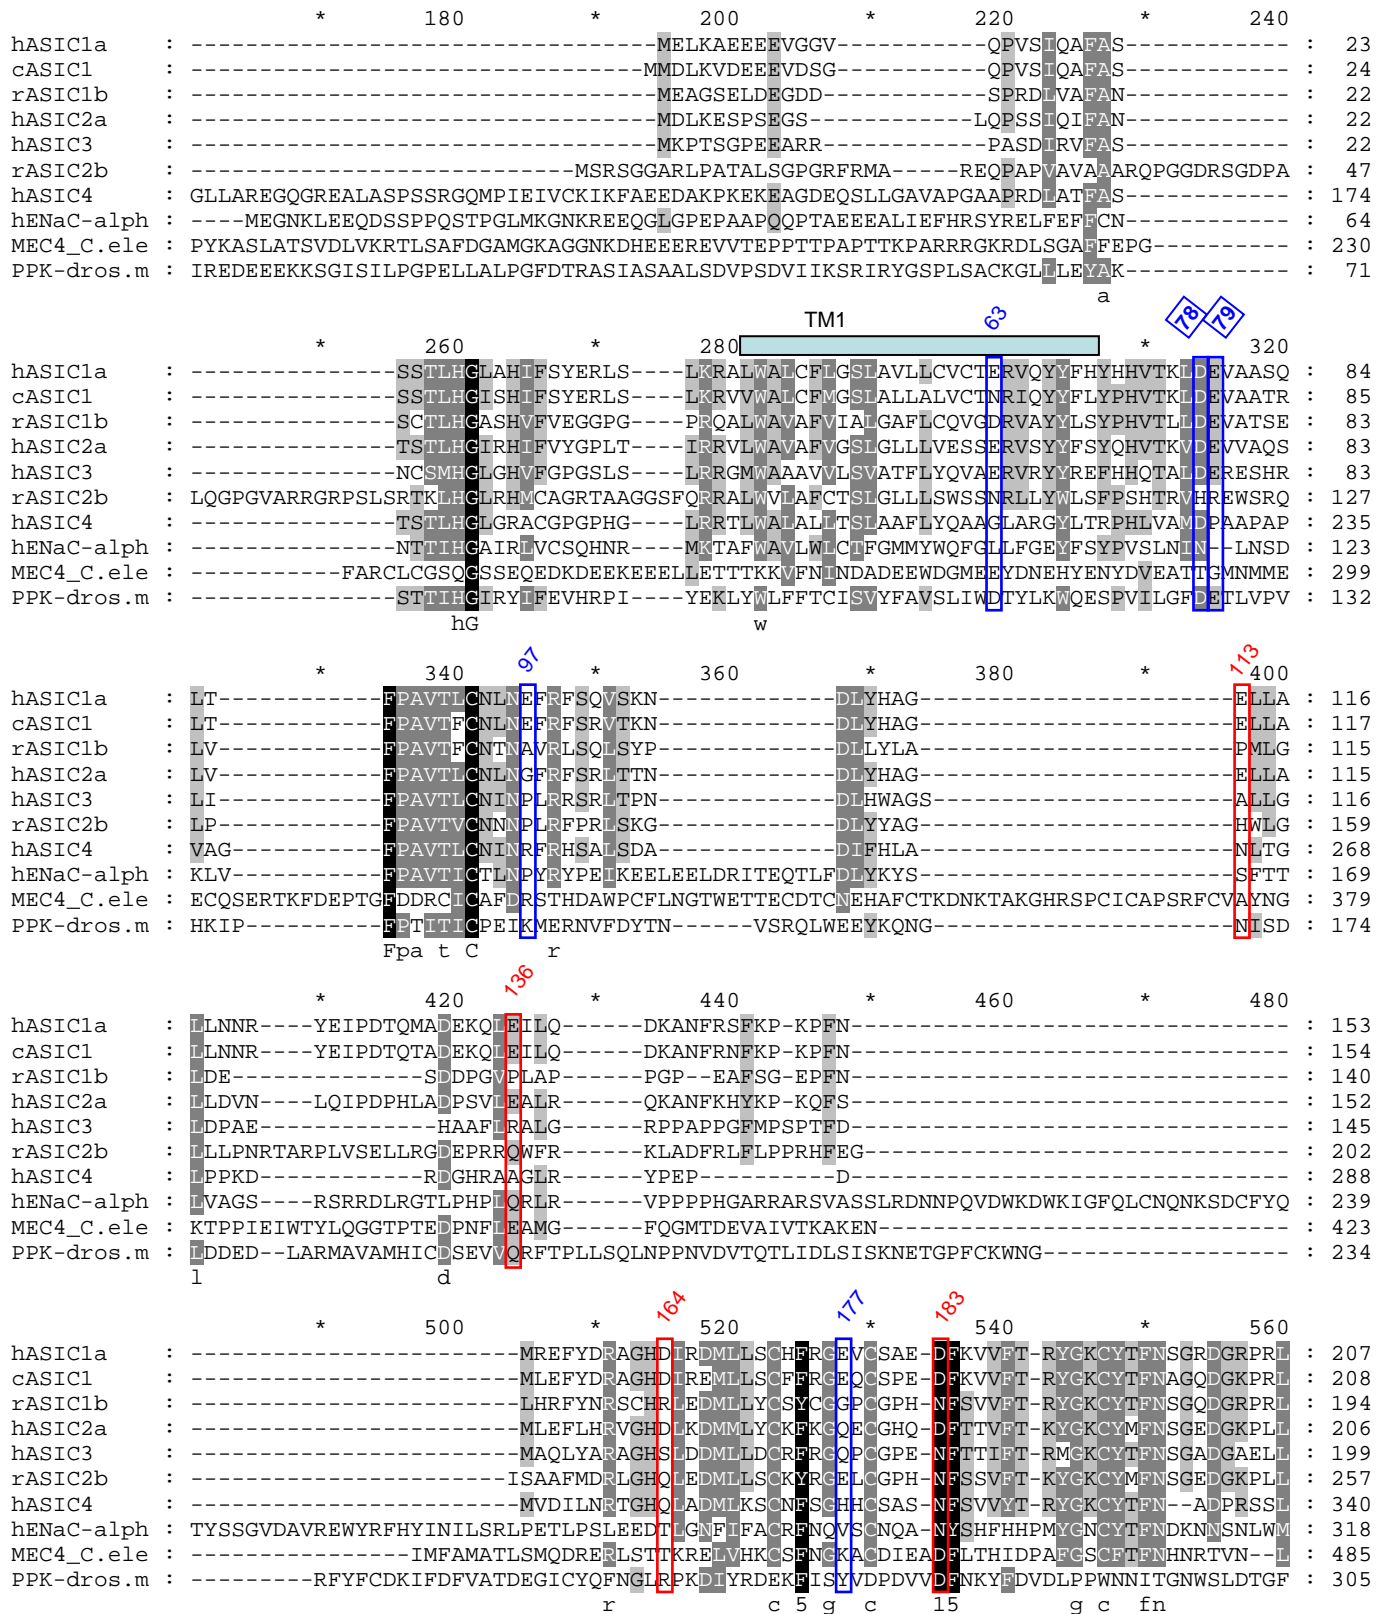

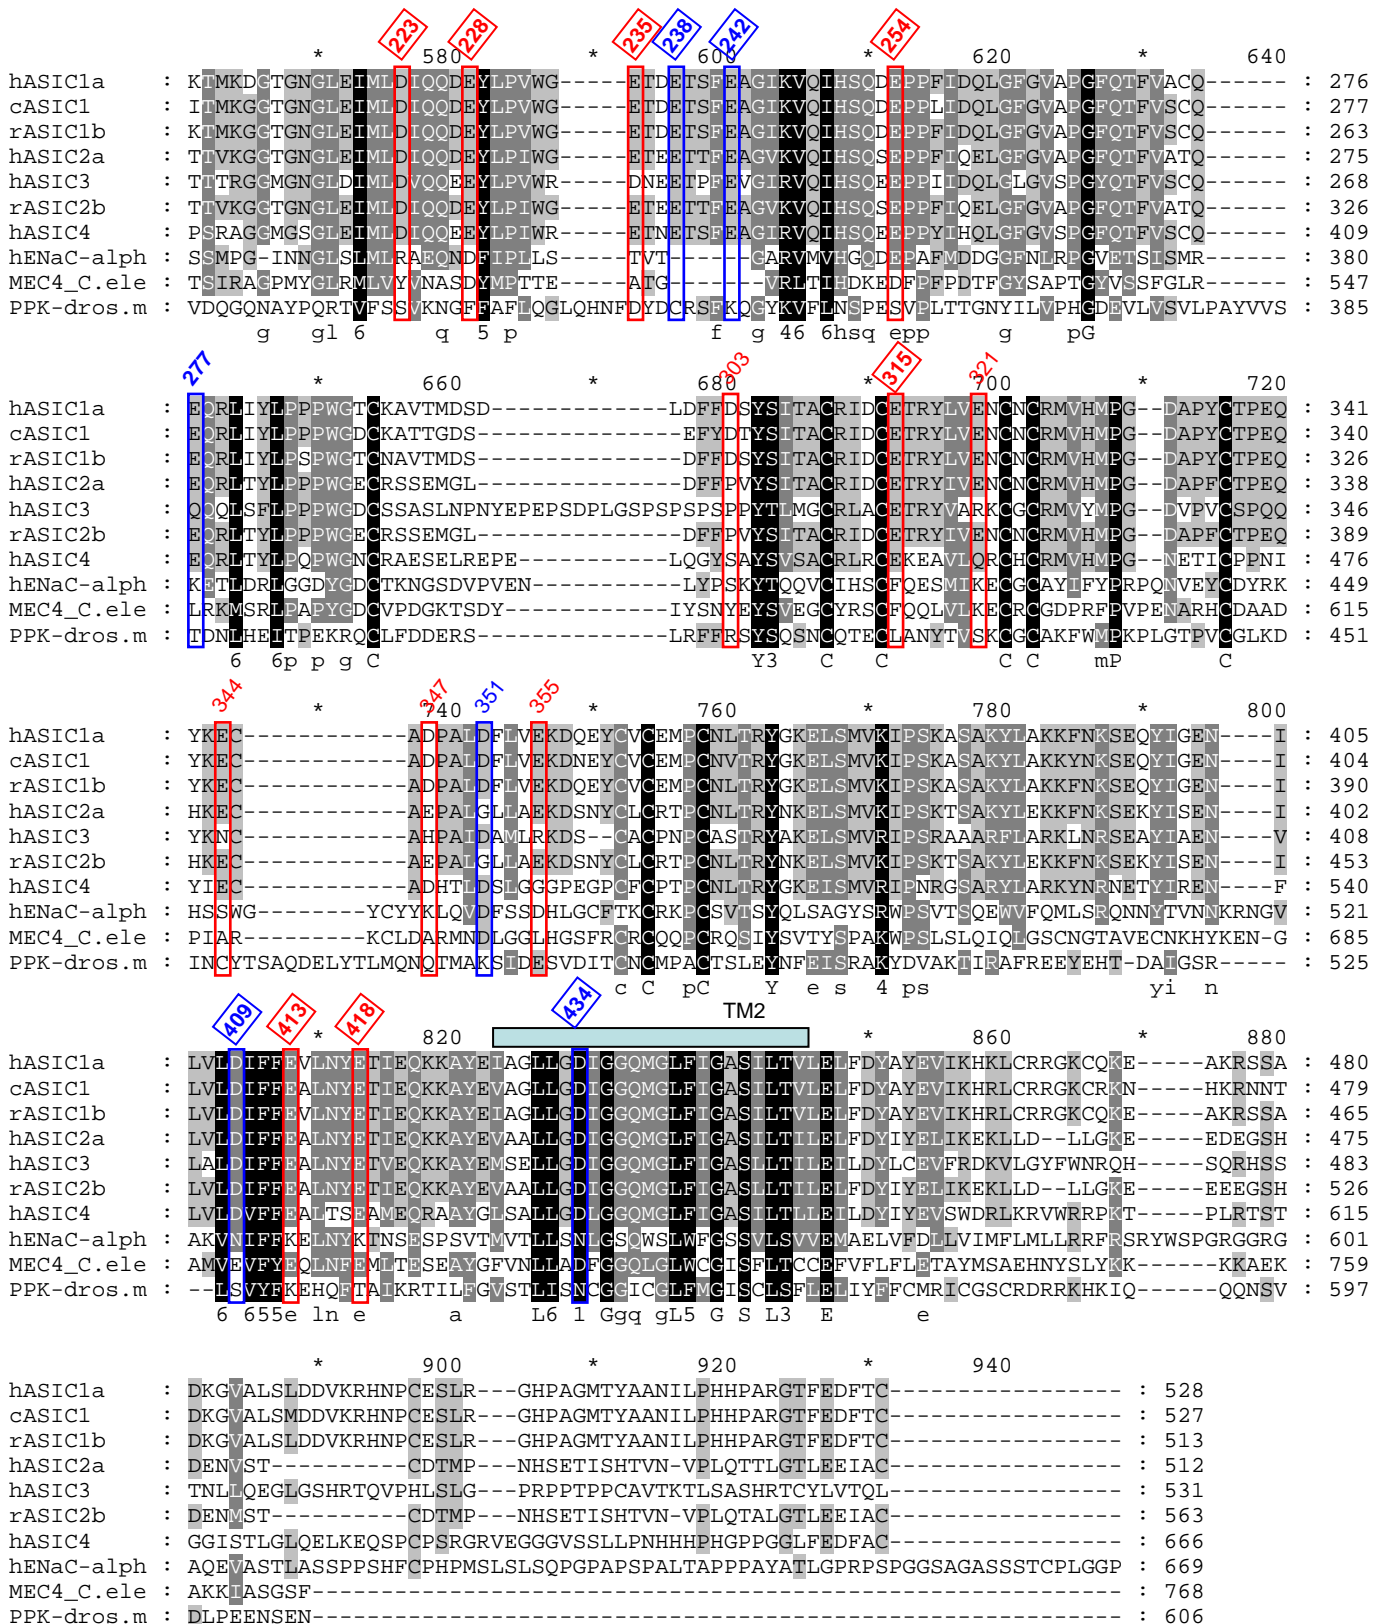

**Supplemental Figure S1. Alignment of ASICs and other family members.** Alignment of ASIC1-4 and ENaC $\alpha$  (human), MEC-4 (*C. elegans*) and Pickpocket (PPK, *drosophila*), indicating Glu and Asp residues with pKa > 8 in blue, with 8 > pKa > 5 in red. Numbers of the amino acid residue in hASIC1a is indicated above the columns and is framed if the residue is conserved within the pH-gated ASIC subunits (ASIC1a, -1b, 2a and 3). GenBank accession numbers are AAB48981.1 (hASIC1a), AAY28986 (cASIC1), EDL86974 (rASIC1b), AAH75042 (hASIC2a), AAC64188 (hASIC3), EDM05432 (rASIC2b), EAW70762 (hASIC4), BAG65217 (ENaC- $\alpha$ ), AAC47265 (MEC-4), and AAF53394 (PPK).



**Supplemental Figure S2. Absence of window current in the E413Q/E418Q double mutant**

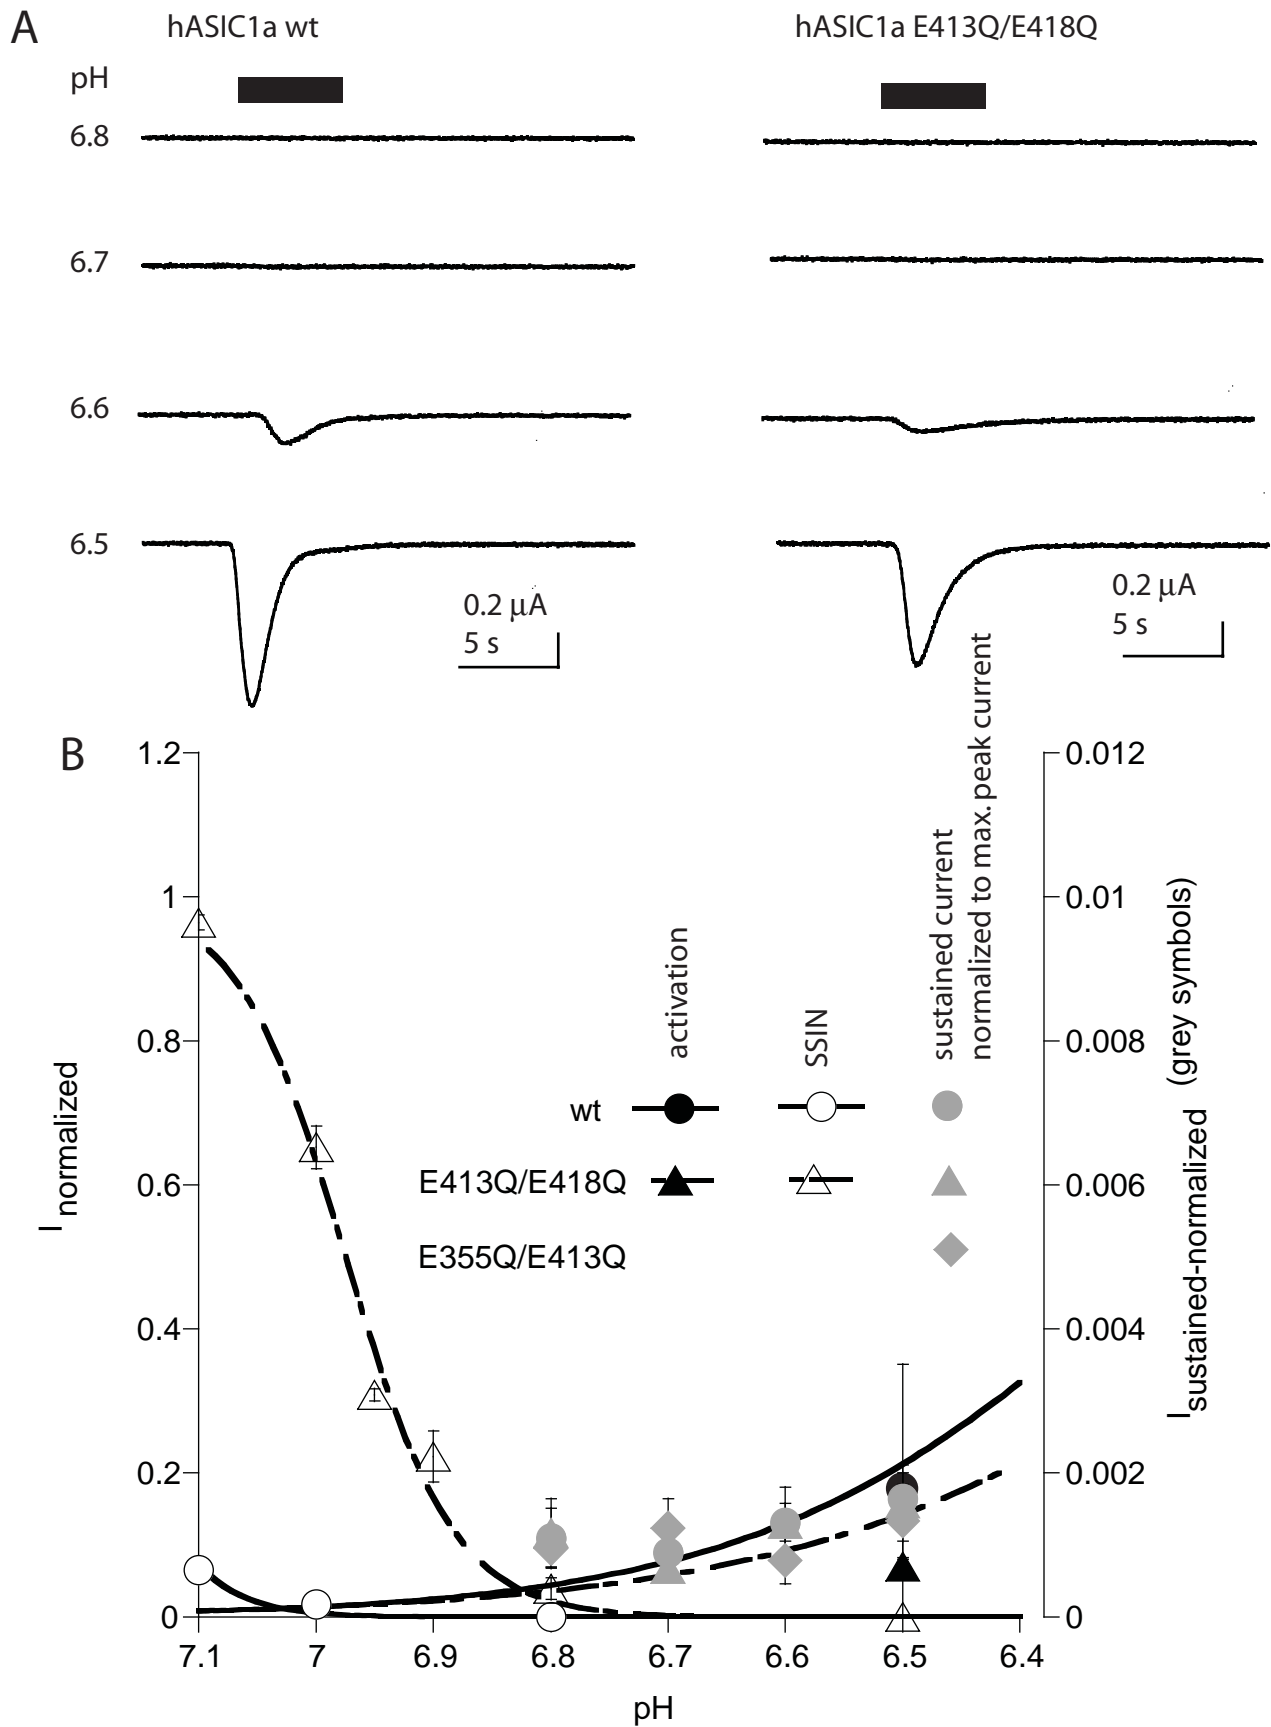

**Supplemental Figure S2. Absence of window current in the E413Q/E418Q double mutant.**

A, Typical traces in response to acidification to the pH indicated, during the time indicated by the black bar. B, Activation and SSIN curves of hASIC1a wt and the mutant E413Q/E418Q. For the pH range 7.1 to 6.4 (black lines, left axis). In grey, the sustained current amplitude, normalized to the peak current amplitude at pH 4.5, is indicated on a 100-fold expanded scale (right axis, n=5-8). This figure shows that in the two mutants represented, the currents inactivate as wt, and that there is no sustained current different from wt.



**Supplemental Table S5. Comparison of pH50-shifts relative to wt in this compared to previous studies**

| Residue | pH50-shift relative to wt in this study | compared mutation | pH50-shift relative to wt | Reference |
|---------|-----------------------------------------|-------------------|---------------------------|-----------|
| E113    | < 0.1                                   | ASIC2a E112Q      | < 0.1                     | (1)       |
| E136    | < 0.1                                   | ASIC2a E135Q      | -0.13                     | (1)       |
| D164    | -0.10                                   | ASIC2a D163N      | < 0.1                     | (1)       |
| D183    | -0.10                                   | ASIC2a D182N      | +0.34                     | (1)       |
| D223    | < 0.1                                   | rASIC1a D223N     | < 0.1                     | (2)       |
| E228    | -0.13                                   | rASIC1a E228Q     | < 0.1                     | (2)       |
| E235    | < 0.1 <sup>b</sup>                      | rASIC1a E235Q     | -0.2                      | (2)       |
| E254    | < 0.1                                   | rASIC1a E254Q     | < 0.1                     | (2)       |
| E344    | < 0.1                                   | rASIC1a E342Q     | < 0.1                     | (2)       |
| D347    | -0.19 <sup>a</sup>                      | cASIC1 D346N      | -0.3 <sup>c</sup>         | (3)       |
| E413Q   | -0.10                                   | rASIC1a E411Q     | -0.1                      | (2)       |
| E418Q   | -0.19 <sup>a</sup>                      | rASIC1a E418Q     | -0.15                     | (2)       |

The pH50 values of mutants of D303, E315, E321 and E355 have not been determined previously, and SSIN has been analyzed for none of these residues to our knowledge. pH50 data are reported from ASIC1 where available, and for some mutants from ASIC2a. rASIC1a, rat ASIC1a ; cASIC1, chicken ASIC1. <sup>a</sup>, difference from wt statistically tested ( $p < 0.05$ ). <sup>b</sup>, nH, Hill coefficient significantly different from wt ( $p < 0.05$ ). <sup>c</sup>, for this mutant a marked decrease in the Hill coefficient was reported.

**Supplemental Table S6. Numbering and species of ASIC residues cited in the discussion**

| Residue in this study | Cited study |                      |           |
|-----------------------|-------------|----------------------|-----------|
|                       | Position    | Species <sup>a</sup> | Reference |
| Y71                   | 72          | r                    | (4)       |
| H72                   | 72          | r                    | (2)       |
| H73                   | 73          | r                    | (2)       |
| H73                   | 72          | ASIC2a               | (5)       |
| D78                   | 78          | r                    | (2)       |
| E79                   | 79          | rASIC3               | (6)       |
| K105                  | 105         | r                    | (2)       |
| N106                  | 106         | r                    | (2)       |
| D107                  | 107         | r                    | (2)       |
| R190                  | 190         | r                    | (2)       |
| E235                  | 235         | r                    | (2)       |
| D237                  | 237         | r                    | (2)       |
| E238                  | 238         | r                    | (2)       |
| D253                  | 253         | r                    | (2)       |
| E254                  | 254         | r                    | (2)       |
| W287                  | 288         | r                    | (4)       |
| D347                  | 346         | c                    | (3)       |
| D351                  | 350         | c                    | (3)       |
| D357                  | 357         | h                    | (7)       |
| D357                  | 355         | r                    | (2)       |
| Q358                  | 358         | r                    | (8)       |
| Q358                  | 358         | h                    | (7)       |
| E359                  | 359         | r                    | (8)       |
| E413                  | 411         | r                    | (2)       |
| E418                  | 416         | r                    | (2)       |

<sup>a</sup>, and indication of ASIC isoform, if different from ASIC1a. r, rat; c, chicken, h, human.

#### References for Tables S5 and S6

1. Smith, E. S., Zhang, X., Cadiou, H., and McNaughton, P. A. (2007) *Neurosci Lett* **426**, 12-17
2. Paukert, M., Chen, X., Polleichtner, G., Schindelin, H., and Grunder, S. (2008) *J Biol Chem* **283**, 572-581
3. Jasti, J., Furukawa, H., Gonzales, E. B., and Gouaux, E. (2007) *Nature* **449**, 316-323
4. Li, T., Yang, Y., and Canessa, C. M. (2009) *J Biol Chem* **284**, 4689-4694
5. Baron, A., Schaefer, L., Lingueglia, E., Champigny, G., and Lazdunski, M. (2001) *J. Biol. Chem.* **276**, 35361-35367
6. Cushman, K. A., Marsh-Haffner, J., Adelman, J. P., and McCleskey, E. W. (2007) *J Gen Physiol* **129**, 345-350
7. Sherwood, T., Franke, R., Conneely, S., Joyner, J., Arumugan, P., and Askwith, C. (2009) *J Biol Chem* **284**, 27899-27907
8. Coric, T., Zheng, D., Gerstein, M., and Canessa, C. M. (2005) *J Physiol (Lond)* **568.3**, 725-735
